# Supplementary material
Source: MDPI journal article supplement (https://www.mdpi.com/2624-5647/2/4/34)

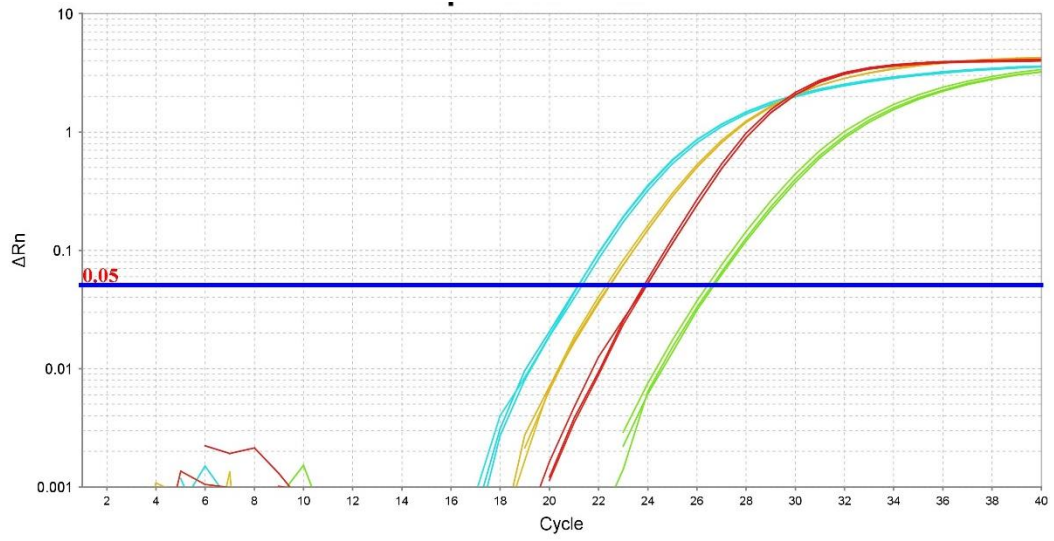

**Supplementary Figure 1: An example of a qPCR plot. Blue: miR-21-5p, Red: miR-27a, Yellow: let-7g, Gren: miR-193-5p.**

Supplement: s1 [file s1]
